1 **Title:** Reproductive interference hampers species coexistence despite  
2 conspecific sperm precedence

3

4 **Authors** (Alphabetically ordered):

5 Ryosuke IRITANI<sup>1, 2, 4</sup> & Suzuki NORIYUKI<sup>3, 4\*</sup>

6

7 <sup>1</sup>Department of Integrative Biology, University of California, Berkeley, USA

8 <sup>2</sup>Biosciences, College of Life and Environmental Science, University of Exeter, Cornwall

9 Campus, Penryn, Cornwall TR10 9EZ, the United Kingdom

10 <sup>3</sup>Faculty of Agriculture and Marine Science, Kochi University, Japan

11 <sup>4</sup>Both authors contributed equally.

12

13

14 \*Author for correspondence

15 E-mail: [fvgnoriyuki@gmail.com](mailto:fvgnoriyuki@gmail.com)

16

17

18 **Abstract**

19

20 Negative interspecific mating interactions, known as reproductive interference, can hamper  
21 species coexistence in a local patch and promote niche partitioning or geographical  
22 segregation of closely related species. Conspecific sperm precedence (CSP), which occurs  
23 when females that have mated with both conspecific and heterospecific males preferentially  
24 use conspecific sperm for fertilization, might contribute to species coexistence by mitigating  
25 the costs of interspecific mating and hybridization. We examined whether two closely related  
26 species exhibiting CSP can coexist in a local environment in the presence of reproductive  
27 interference. First, using a behaviourally explicit mathematical model, we demonstrated that  
28 two species characterized by negative mating interactions are unlikely to coexist because the  
29 costs of reproductive interference, such as loss of mating opportunity with conspecific  
30 partners, are inevitably incurred when individuals of both species are present. Second, we  
31 experimentally demonstrated differences in mating activity and preference in two *Harmonia*  
32 ladybird species known to exhibit CSP. According to the developed mathematical model of  
33 reproductive interference, these behavioural differences should lead to local extinction of *H.*  
34 *yedoensis* because of reproductive interference by *H. axyridis*. This prediction is consistent  
35 with field observations that *H. axyridis* uses various food sources and habitats whereas *H.*  
36 *yedoensis* is confined to a less preferred prey item and a pine tree habitat. Finally, by a  
37 comparative approach, we showed that niche partitioning or parapatric distribution, but not  
38 sympatric coexistence in the same habitat, is maintained between species with CSP belonging  
39 to a wide range of taxa, including vertebrates and invertebrates living in aquatic or terrestrial  
40 environments. Taken together, these results lead us to conclude that reproductive interference  
41 generally destabilizes local coexistence even in closely related species that exhibit CSP.

42

43 **Key words:** community dynamics, competitive exclusion, host specialization, niche  
44 partitioning, reproductive interference, reproductive isolation, resource competition

45

46

## 47 **Introduction**

48

49 Restrictions to local coexistence among phylogenetically related species are closely related to  
50 niche partitioning and the diversification of resource use traits, which help to determine  
51 community assemblages at both local and regional scales (Schluter 2000, Grant and Grant  
52 2011, Losos 2011). Therefore, understanding the mechanisms that restrict local coexistence is  
53 of fundamental importance in ecology and evolution. Negative interspecific mating  
54 interaction, that is, reproductive interference, is one mechanism that can drive species  
55 exclusion at local scale and subsequent niche partitioning among species (Gröning and  
56 Hochkirch 2008). Reproductive interference has been theoretically demonstrated to hamper  
57 species coexistence in a homogeneous environment even in ecologically neutral species with  
58 similar growth rates and abilities to compete for shared resources (Kuno 1992, Konuma and  
59 Chiba 2007, Crowder et al. 2011, Nishida et al. 2015, Kyogoku and Sota 2017). Moreover,  
60 empirical studies have also reported that reproductive interference contributes to niche  
61 partitioning between congeneric species with overlapping mating signals, including in frogs  
62 (Ficetola and Bernardi 2005), birds (Vallin et al. 2012), mites (Takafuji et al. 1997), and  
63 insects (butterflies, Friberg et al. 2013; grasshoppers, Hochkirch et al. 2007; ladybirds,  
64 Noriyuki et al. 2012). Therefore, reproductive interference is a determinant of local and  
65 regional species diversity in a wide range of animal taxa in nature, though its significance in

66 community ecology has been underestimated for decades (Gröning and Hochkirch 2008,  
67 Kyogoku 2015).

68 A number of mechanisms, however, are reported to mitigate the negative impacts of  
69 reproductive interference on the coexistence of species occupying the same niche, including  
70 plastic responses in reproductive traits (Otte and Hilker 2016), continued dispersal to new sets  
71 of ephemeral resource patches (Ruokolainen and Hanski 2016), and reinforcement of  
72 reproductive isolation (Bargielowski et al. 2013). One possible mitigating mechanism is  
73 conspecific sperm precedence (CSP), where females that have mated with both conspecific  
74 and heterospecific males preferentially use conspecific sperm for fertilization (Howard 1999).  
75 Such females might experience fewer costs associated with interspecific mating and  
76 hybridization (i.e., waste of gametes), because most or all of their offspring will be pure  
77 conspecifics (Nakano 1985, Veen et al. 2001, Marshall et al. 2002). In addition, in various  
78 animals, mating order has been shown to have no influence on whether a female is able to  
79 preferentially use conspecific sperm (Howard et al. 1998, Marshall et al. 2002), suggesting  
80 that complete CSP can largely eliminate the negative impact of interspecific mating provided  
81 that females have mated with at least one conspecific male before the onset of oviposition or  
82 birthing (Marshall et al. 2002). CSP has been reported in a variety of animal taxa, including  
83 sea urchins (Geyer and Palumbi 2005), mussels (Klibansky and McCartney 2013), crickets  
84 (Howard et al. 1998), fruit flies (Price 1997), beetles (Fricke and Arnqvist 2004, Rugman-

85 Jones and Eady 2007), fishes (Yeates et al. 2013), and mice (Dean and Nachman 2009), and  
86 thus potentially plays an important role in species coexistence. Although CSP has attracted  
87 much attention as a driver of speciation through post-mating and pre-zygotic reproductive  
88 isolation (Howard et al. 1998; Howard 1999), it is still unclear whether CSP can sufficiently  
89 ameliorate the cost of reproductive interference to promote stable coexistence of closely  
90 related species in the same local environment.

91 CSP may not fully function as a barrier against reproductive interference. Under  
92 imperfect species discrimination, individual females may incur a variety of costs as a result of  
93 interactions with heterospecific males during the reproductive process, such as reduced  
94 longevity and oviposition rates (Kawatsu and Kishi 2017), physical damage caused by  
95 interspecific copulation (Kyogoku and Sota 2015), and loss of opportunity to mate with  
96 conspecific partners (Thum 2007, Noriyuki et al. 2012, Ramiro et al. 2015), as well as the  
97 production of unviable hybrid offspring (Todesco et al. 2016). CSP alone might be insufficient  
98 to compensate all of these potential costs of reproductive interference. In addition, adaptive  
99 behaviours of females and males can prevent multiple matings by females and consequently  
100 make the CSP mechanism useless. For example, studies on sexual conflict have shown that  
101 females are likely to avoid multiple matings when the benefit is low (Eberhard 1996, Arnqvist  
102 and Rowe 2005). Moreover, to prevent sperm competition, males often try to prevent females  
103 from mating multiple times, for example, by mate guarding after copulation (Alcock 1994),

104 by placing a physical plug in female reproductive organs (Matsumoto and Suzuki 1992, Polak  
105 et al. 2001), or by insertion of a chemical that inhibits remating receptivity (Scott 1986,  
106 Gillott 2003, Himuro and Fujisaki 2008). Therefore, to evaluate the ecological role of CSP in  
107 species coexistence, various behavioural and physiological mechanisms affecting the  
108 reproductive process must be taken into account.

109 In this study, we examined whether CSP can mitigate the effect of reproductive  
110 interference in two closely related species so that they are able to coexist in a local  
111 environment. We adopted a tripartite approach. First, we developed a behaviourally explicit  
112 mathematical model to analyse behavioural and demographic factors affecting local species  
113 coexistence, with a focus on the multiple copulation rate, mating preference toward  
114 conspecific or heterospecific partners, and the initial population densities of the two species.  
115 Second, we conducted mating experiments with two predatory ladybird species, *Harmonia*  
116 *axyridis* and *Harmonia yedoensis*, to test the predictions of the mathematical model. CSP has  
117 been detected in both these species (Noriyuki et al. 2012), and they occupy different niches in  
118 nature; *H. axyridis* is a generalist that feeds on various species of preferred aphids, whereas *H.*  
119 *yedoensis* specializes on the giant pine aphid, which is a highly elusive prey item and  
120 nutritionally poor for larval development (Noriyuki et al. 2011, Noriyuki and Osawa 2012). In  
121 addition, the reproductive success of *H. yedoensis* females is strongly decreased in the  
122 presence of *H. axyridis* males, suggesting that *H. yedoensis* might utilize the less preferred

123 food and habitat to avoid reproductive interference from *H. axyridis* (Noriyuki et al. 2012).  
124 Third, we investigated the general consequences of CSP on species coexistence in nature by  
125 compiling published data on pairs of species in which CSP has been detected and found that  
126 such species pairs generally show niche separation (habitat and food source) or  
127 geographically separate distributions. We concluded from our results that CSP does not reduce  
128 the overall cost of reproductive interference sufficiently to allow the interacting species to  
129 coexist in the same local environment.

130

## 131 **Materials and methods**

132

### 133 **Mathematical model**

134

135 We modelled a community of two species (X and Y), with density  $N_X(t)$  and  $N_Y(t)$ ,  
136 respectively, in generation  $t$ , inhabiting a single patch. The two species interact through  
137 resource competition as well as through reproductive interference, but they are ecologically  
138 neutral in terms of the total number of offspring per capita that survive to maturation (denoted  
139  $r$ ), density-dependent regulation (denoted  $v$ ), and interspecific competitive strength (denoted  
140  $b$ ). We assumed a sex ratio of 1:1 (though we found that the ratio does not affect the results;  
141 see Kyogoku and Sota 2017), and, for the sake of simplicity, at most two instances of

142 copulation per female. Finally, we assumed that females are not always capable of correctly  
143 assessing the species identity of their mating partner; as a result, interspecific mating can  
144 occur even after intraspecific mating (as is the case in *H. yedoensis* and *H. axyridis*).

145 Species X and Y can differ with respect to the rate at which females accept males as  
146 mates (Fig. 1). Specifically, a virgin X-female (i.e., a female of species X) accepts a mating  
147 attempt by an X-male with probability  $p_{X|X}$  and a Y-male with probability  $p_{X|Y}$ , and a once-  
148 mated female accepts a mating attempt by an X-male with probability  $q_{X|X}$  and with a Y-male  
149 with probability  $q_{X|Y}$ . Similarly, the probabilities of a Y-female accepting a mating attempt by  
150 a male in the corresponding situations are  $p_{Y|Y}$ ,  $p_{Y|X}$ ,  $q_{Y|Y}$ , and  $q_{Y|X}$ .

151 The frequencies of X-males and Y-males (among all males in the community) are as  
152 follows:

153 [Equation 1]

$$154 \quad f_X = \frac{N_X}{N_X + N_Y}, f_Y = \frac{N_Y}{N_X + N_Y}. \quad (1)$$

155 We denote the expected reproductive output by a single X-female or a single Y-female by  $E_X$   
156 or  $E_Y$ , respectively. Parameter  $c$  tunes the intensity of reproductive interference ( $0 < c < 1$ )  
157 and reflects the degree of interspecific overlap in the reproductive niche; thus, the expected  
158 reproductive output of an X- or Y-female is calculated as:

159 [Equation 2]

$$160 \quad E_X = \left( (1 - c) + c \cdot \frac{(p_{X|X} + p_{X|Y} \cdot q_{X|X} f_Y) f_X}{f_X \cdot p_{X|X} + f_Y \cdot p_{X|Y}} \right) r, \quad (2)$$



$$161 \quad E_Y = \left( (1 - c) + c \cdot \frac{(p_{Y|Y} + p_{Y|X} \cdot q_{Y|Y} f_X) f_Y}{f_Y p_{Y|Y} + f_X p_{Y|X}} \right) r,$$

162 (see Appendix A). Within the parentheses on the right side of each Eq. (2),  $(1 - c)$  represents  
163 reproductive success independent of density and frequency, and the second term represents  
164 the product of reproductive interference intensity ( $c$ ) and the conditional probability that,  
165 given a non-virgin, a single female mates with a conspecific male at least once.

166 To model the population dynamics under intra- and interspecific competition, we used  
167 the Beverton–Holt model of community dynamics (Beverton and Holt 1957, May and Oster  
168 1976, Ackleh and Salceanu 2014). Specifically, we assume that regulation occurs among  
169 adults, followed by reproduction. Under this assumption, the dynamics are as follows:

170 [Equation 3]

$$171 \quad N_X(t + 1) = \frac{N_X(t)E_X(t)}{1 + vN_X(t) + vbN_Y(t)}, \quad (3)$$

$$172 \quad N_Y(t + 1) = \frac{N_Y(t)E_Y(t)}{1 + vbN_X(t) + vN_Y(t)}$$

173 where  $t$  represents the generation,  $r \geq 1$  represents the life-time survival rate (subsuming the  
174 total number of eggs per capita),  $v \geq 0$  tunes density dependence in regulation, and  $b$  ( $0 \leq$   
175  $b \leq 1$ ) tunes the strength of interspecific resource competition. Throughout this analysis, we  
176 set  $v = 1$ , which does not cause any loss of generality (Ackleh and Salceanu 2014). By using  
177 the underlying link between a continuous-time logistic equation and the discrete-time  
178 Beverton–Holt model (May and Oster 1976), we approximate the dynamics by the following  
179 ordinary differential equations (ODE):

180 [Equation 4]

$$181 \quad \frac{dN_X(t)}{dt} = \frac{N_X(t)E_X(t)}{1+(N_X(t)+bN_Y(t))} - N_X(t), \quad (4)$$

$$182 \quad \frac{dN_Y(t)}{dt} = \frac{N_Y(t)E_Y(t)}{1+(bN_X(t)+N_Y(t))} - N_Y(t).$$

183 All variables and parameters are defined in Table 1. The community equilibrium is obtained  
184 by setting Eqs. (4) to zero. We also carry out a basic local stability analysis of the equilibrium  
185 of the dynamical system to determine possible equilibrium states. Specifically, we identified  
186 conditions leading to *species exclusion* (i.e., only one species persists) or *coexistence* (i.e.,  
187 both species coexist).

188 We also visualized the steady states by a numerical approach, first (i) evaluating the  
189 eigenvalues of the Jacobi matrix of equilibria and then (ii) depicting the phase portraits (using  
190 Mathematica 11.2.0; Wolfram Research 2017). For the eigenvalue analyses, we first checked  
191 the number of feasible equilibria ( $N_X, N_Y \geq 0$ ) given the community dynamics and then  
192 numerically evaluated the real part of the eigenvalues associated with the corresponding  
193 equilibria.

194

## 195 **Experiment**

196 We collected adults of two ladybird species from Japanese red pine (*Pinus densiflora* Sieb. et  
197 Zucc.) at the University of Tokyo Tanashi Forest (139°32'E, 35°44'N), Tanashi city, Tokyo,  
198 during April 2014, and at the Kumagaya campus of Rissho University (139°36'E, 36°10'N)

199 and the Hirose Wild Birds Forest (139°35'E, 36°14'N), Kumagaya city, central Japan, during  
200 April 2015. In the laboratory, we maintained females individually in plastic Petri dishes (9 cm  
201 in diameter by 1.5 cm high) at 25 °C, and fed them each day with a surplus of frozen *Ephestia*  
202 *kuehniella* Zeller eggs (Beneficial Insectary, Ontario, Canada) to ready them for reproduction.  
203 In total, 15 *H. yedoensis* and 8 *H. axyridis* females in 2014 and 10 *H. yedoensis* and 9 *H.*  
204 *axyridis* females in 2015 produced a sufficient number of egg clutches for our experiments. In  
205 addition, in 2015, we collected 32 *H. yedoensis* egg clutches and 41 *H. axyridis* egg clutches  
206 that had been oviposited on the leaves and branches of Japanese red pine trees at the Hirose  
207 Wild Birds Forest. We fed the hatched offspring from both laboratory-laid and wild-collected  
208 egg clutches with a mixture of sucrose, dried yeast, and powdered drone honeybee (following  
209 Nijjima et al. 2000) to the adult stage in plastic cases (each 12.5 cm in diameter by 9.5 cm  
210 high) containing wood wool as a substrate on which they could walk. We recorded the date of  
211 emergence, body length (to the nearest 0.01 mm), and elytra colour (black or red) of all newly  
212 emerged adults as possible factors affecting mating preference, and used these virgin  
213 individuals for the following behavioural experiments to standardize the mating experience.  
214 Because it takes approximately 1 month for most individuals of both *H. yedoensis* and *H.*  
215 *axyridis* to mature sexually after they emerge as adults (Okada, Nijjima & Toriumi 1978), we  
216 reared the newly emerged adults individually in plastic Petri dishes for at least 30 days,  
217 providing them with frozen *E. kuehniella* eggs every other day, before using them in mating

218 experiments. In addition, we excluded egg clutches from the wild-caught mothers that  
219 produced only female offspring (two *H. yedoensis* females in 2014 and one *H. axyridis* female  
220 in 2015) because they were likely to be infected with male-killing bacteria (Noriyuki et al.  
221 2014, 2016), to avoid any confounding effects of male-killing bacteria on the host mating  
222 behaviour (Majerus 2003).

223 In the mating experiment, we kept one female (*H. yedoensis* or *H. axyridis*) and one male  
224 (*H. yedoensis* or *H. axyridis*) together in a small Petri dish (5 cm in diameter) on a laboratory  
225 bench at room temperature (25 °C) under constant fluorescent lighting. We never placed  
226 females with sibling males (i.e., individuals produced by the same wild-caught mother or  
227 from the same wild-collected clutch) to preclude any effects of inbreeding avoidance on  
228 mating behaviour. We observed the occurrence of male mating attempts, female rejection  
229 behaviour, and successful copulation in each experimental session (see Noriyuki et al. 2012  
230 for the definition of these behaviours). In 2014, we visually observed mating activities during  
231 15-min sessions. In 2015, we used videocameras (HC-V480, Panasonic, Osaka, Japan) to  
232 record experimental sessions for at least 6 hours (up to 20 hours) and then watched the videos  
233 to analyse mating behaviours. In the 2014 experiments, each pair was allowed to mate after  
234 the 15-min session until copulation was completed. In the 2015 experiments, multiple  
235 copulations were allowed in the same experimental session. Note that Noriyuki et al. (2012)  
236 reported that the mean duration of copulation was 228 min in *H. yedoensis* and 124 min in *H.*

237 *axyridis* under similar experimental conditions. In both 2014 and 2015, we reused virgin and  
238 non-virgin individuals after the experimental session for other sessions to analyse the effects  
239 of mating experience on subsequent mating behaviour.

240 To examine the effect of mating experience in virgins and non-virgins on the copulation  
241 rate in each species, we analysed the proportion of experimental sessions that included  
242 successful copulation (at least one in the 2015 experiments) by a generalized linear mixed  
243 model with a binomial error structure using the `glmer` function of the `lme4` library (Bates et al  
244 2015) of the R software package (version 3.4.2, R Core Team 2017). Similarly, we compared  
245 the mating rate between intra- and interspecific mating trials in virgin and non-virgin females.  
246 Moreover, we analysed mating preferences of both males and females to determine factors  
247 responsible for the copulation rate. First, we evaluated male preference by the proportion of  
248 experimental sessions that included at least one male mating attempt, whether or not it was  
249 followed by successful mating. Second, we examined the female preference by calculating the  
250 proportion of male mating attempts that elicited female rejection behaviour. In all analyses,  
251 we also incorporated the date of emergence, body length, and elytra colour of females and  
252 males as fixed effects, and the identity of the mother of the female and that of the male as a  
253 random term. We analysed data from the experiments in 2014 and 2015 separately because of  
254 the differences in the source populations and the specific experimental conditions.

255 Furthermore, we applied signal detection theory (Green and Swets 1966) to disentangle

256 the mechanism of decision making in males and females who need to choose conspecific  
257 mating partner over heterospecifics. We computed two statistics,  $d'$  and  $\beta$ , where  $d'$  is signal  
258 strength (a higher value indicates that the mating signal from conspecifics is more readily  
259 detected), and  $\beta$  reflects an individual's mating strategy.  $\beta \approx 1.0$  indicates unbiased decision  
260 making;  $\beta \approx 0.0$  indicates a bias towards mating with either a conspecific or heterospecific  
261 individual (i.e., a liberal strategy); and  $\beta > 1.0$  indicates a bias towards rejection of mating  
262 with either a conspecific or heterospecific individual (i.e., a conservative strategy).  $d'$  and  $\beta$  in  
263 response to signals (male mating attempt and female rejection behaviour) in each species were  
264 computed by using the `dprime` function of the `neuropsychology` library for the R software  
265 package (Makowski 2017). To visualize the decision-making performance in response to both  
266 male mating attempts and female rejection behaviour, we calculated the receiver operating  
267 characteristic (ROC) curve, which compares the sensitivity (the true positive rate, plotted on  
268 the  $y$ -axis) with the specificity (the false positive rate, plotted on the  $x$ -axis), for the signal  
269 detection results by using the `ROCR` package for R (Sing et al. 2005). Essentially, the closer  
270 an ROC curve is to the upper left corner, the better the decision-making accuracy, and the  
271 closer the curve is to the diagonal line of the panel (i.e.,  $y = x$ ), the more likely that the result  
272 is owing to chance alone (Carter et al. 2016). In addition, we used the DeLong method in the  
273 `pROC` package for R (Robin et al. 2011) to statistically compare the area under the ROC  
274 curve (AUC) between species in each experiment year.

275

276 **Comparative study**

277 We performed a literature survey, using the ISI Web of Science

278 (<https://webofknowledge.com/>) on 30 November 2017 and the key phrase “conspecific sperm

279 precedence”, to identify congeneric pairs of animal species in which CSP had been detected in

280 at least one of the pair. In addition, we screened the reference lists of two review papers for

281 CSP (Howard 1999, Marshall et al. 2002) to locate additional pairs. We classified the

282 geographic distributions and niches of each pair into one of four categories: (1) sympatry,

283 geographical distribution of the two species largely overlaps with little if any niche separation

284 in the sympatric area; (2) niche partitioning, geographical distributions of the two species

285 overlap with niche partitioning at local scale (e.g., separation by food, habitat, or seasonality)

286 especially at the reproductive stage; (3) parapatry, geographical distributions of the two

287 species do not overlap but are adjacent with a narrow contact (hybridization) zone; or (4)

288 allopatry, geographical distributions of the two species do not overlap and are not adjacent.

289 We excluded species with cosmopolitan, human-mediated distributions (e.g., *Drosophila*

290 *simulans*, *Tribolium* flour beetles, and *Callosobruchus* bean weevils) from the analysis

291 because their habitats and distributions in the natural environment are unclear. In total, we

292 analysed 24 species pairs of marine invertebrates, terrestrial insects, and vertebrates.

293

## 294 **Results**

295

### 296 **Mathematical model**

#### 297 *Equilibria*

298 We found dynamic population equilibria, designated by an asterisk (\*), on (i) the  $N_X$ -axis (i.e.,  
299  $N_X^* > 0, N_Y^* = 0$ ), (ii) the  $N_Y$ -axis (i.e.,  $N_X^* = 0, N_Y^* > 0$ ), or (iii) in the interior (i.e.,  $N_X^* >$   
300  $0, N_Y^* > 0$ ). The boundary equilibria (as a result of competitive exclusion) are given by

$$301 \quad B_X = (r - 1, 0), B_Y = (0, r - 1)$$

302 whereas the interior equilibrium did not have analytical formula (note that because we assume  
303  $r > 1$ , boundary equilibria were always feasible).

#### 304 *Stability analyses*

305 The stability conditions for the equilibria (species exclusion or coexistence) were determined  
306 from the eigenvalues of a Jacobi matrix around the focal equilibrium (more details are given  
307 in Appendix B). The necessary condition for a stable equilibrium resulting in extinction of one  
308 of the two species is given by:

309 [Equation 5]

$$310 \quad b + c \frac{r}{r-1} > 1. \quad (5)$$

311 In particular,  $c = 1$  (i.e., reproductive niches of the species overlap completely) necessarily  
312 leads to competitive exclusion given the parameter set for  $p$  and  $q$  used in our analysis (Fig.



313 2), even in the absence of interspecific resource competition (i.e.,  $b = 0$ ). See Appendix C for  
314 the numerical procedures for basins of attraction.

315 We note here that, if the two species are highly symmetric in terms of  $p$  and  $q$  values,  
316 then more outcomes become possible; in particular, species exclusion and coexistence states  
317 can be stable simultaneously (“bi-stable”), in agreement with Kishi and Nakazawa (2013) and  
318 Kyogoku and Sota (2017). Our particular intention here, however, is to explore the effects of  
319 asymmetry in mating behaviour ( $p$  and  $q$  values) on the community dynamics in our  
320 experimental system. For more details about the consequences of symmetric  $p$  and  $q$  values,  
321 see Appendix D. Also, it is possible to incorporate differences in the number of mating  
322 attempts in a given time period (i.e., mating activity) such that the encounter rate with an X-  
323 or Y-male can be biased towards either species relative to their frequency in the community ( $f_X$   
324 and  $f_Y$ ); however, changes in the encounter rate did not change the results dramatically,  
325 although species exclusion became more likely (see Appendix D for more information).

326

## 327 **Experiment**

328 Mating experience did not have a significant effect on the rate of copulation in either the 2014  
329 or the 2015 experiment (Fig. SI 4, Table S1); therefore, virgin and non-virgin females were  
330 pooled in the following analyses. The copulation rate was higher in *H. axyridis* females than  
331 in *H. yedoensis* females, especially in the 2014 experiments, although the difference was not

332 statistically significant (Fig. 3, Table S2). In the 2015 experiment, *H. axyridis* was more likely  
333 to mate with conspecifics, whereas no such assortative mating pattern was observed in *H.*  
334 *yedoensis*; that is there was a significant interaction effect between female species and species  
335 identity of the mating partner (conspecific or heterospecific; Fig. 3, Table S2). In both the  
336 2014 and 2015 experiments, *H. axyridis* males more frequently attempted to mate with  
337 conspecific females, whereas *H. yedoensis* males did not show a significant preference  
338 towards conspecific females (Table S3). *Harmonia axyridis* females were more likely than *H.*  
339 *yedoensis* females to refuse mating attempts by conspecific males, especially in the 2014  
340 experiment (Table S4); however, both coercive mating and copulation failure occurred in both  
341 species following female rejection behaviour.

342 In the signal detection analysis results,  $d'$  in response to male mating attempts was higher  
343 in *H. axyridis* than in *H. yedoensis* in both 2014 and 2015 (Table S5). Further, the AUC for  
344 male mating attempts was significantly higher in *H. axyridis* than in *H. yedoensis* in both  
345 2014 and 2015 (Fig. 4, Table 2). By contrast, no consistent pattern in female rejection  
346 behaviour was detected between species or years in the signal detection analysis, probably in  
347 part because of the small sample size (Table S6). The AUC results for female rejection  
348 behaviour was also not significantly different between species in either experiment year (Fig.  
349 4, Table 2).

350

351 (c) Comparative study

352 We found spatial separation at both local (niche partitioning) and regional scales (parapatry or  
353 allopatry) among species pairs exhibiting CSP, including in marine abalones, freshwater  
354 fishes, terrestrial insects, birds, and mice (Table 3). We observed parapatry mainly in  
355 Orthoptera (crickets and grasshoppers). We detected sympatry without apparent niche  
356 partitioning in 6 of 24 species pairs, especially in aquatic invertebrates such as mussels,  
357 starfishes, and sea urchins.

358

## 359 **Discussion**

360

361 Our results suggest that reproductive interference is likely to hamper stable species  
362 coexistence in a local patch even when the interacting species exhibit CSP. Our experimental  
363 results for two species in which CSP has been detected showed that the mating rate in a given  
364 period was higher in *H. axyridis* females than in *H. yedoensis* females (Fig. 3), and that *H.*  
365 *axyridis*, but not *H. yedoensis*, was more likely to copulate with a partner of its own species  
366 (Figs. 3 and 4). Our mathematical model indicated that these observed behavioural differences  
367 between these *Harmonia* species have a community-level consequence: namely, *H. yedoensis*  
368 becomes extinct in a local patch because of reproductive interference from *H. axyridis* (Figs.  
369 SI 2 and SI 3). Furthermore, our comparative study of species pairs exhibiting CSP

370 demonstrated that parapatric distribution or niche partitioning, but not sympatric coexistence  
371 in the same habitat, can be maintained between two closely related species of a wide range of  
372 taxa, including both vertebrates and invertebrates living in either aquatic or terrestrial  
373 environments (Table 3). Taken together, these results lead us to conclude that CSP does not  
374 generally promote local coexistence between closely related species with overlapping  
375 reproductive niches.

376 Our experiment using *Harmonia* ladybirds, combined with our theoretical analysis,  
377 clarified the behavioural mechanisms of species exclusion. The rate of copulation was not  
378 significantly different between virgin and non-virgin females in the two *Harmonia* species  
379 (Fig. SI 4), suggesting that mating experience did not affect the reproductive success of  
380 individuals or the subsequent population dynamics in these species. However, the results of  
381 our signal detection analysis indicated that *H. axyridis* males easily distinguish and choose  
382 conspecific females over heterospecific females (Fig. 4, Table 2), whereas mating rates with  
383 conspecifics was low in *H. yedoensis* (Fig. 3). Our mathematical model demonstrated that, in  
384 the situations examined by our experiments, *H. axyridis* is likely to mate with a conspecific  
385 partner at least once before oviposition begins, whereas *H. yedoensis* females, even though  
386 they exhibit CSP, are incapable of producing viable offspring in the presence of *H. axyridis*  
387 males, with the result that *H. axyridis* is predicted to exclude *H. yedoensis* from the local  
388 patch (Fig. 2). This prediction is consistent with the niche partitioning observed in the field,

389 where *H. axyridis* feeds on preferred prey items on various types of trees and *H. yedoensis*  
390 specializes in highly elusive prey on only pine trees. The pine habitat may function as a refuge  
391 for *H. yedoensis*, where it can avoid reproductive interference from *H. axyridis* (Noriyuki et  
392 al. 2012).

393 Our mathematical model highlighted the behavioural mechanisms that affect the  
394 asymmetry of reproductive interference and subsequent species exclusion. Although the  
395 classic theory of interspecific competition postulates that species exclusion occurs through  
396 exploitative competition for shared resources (Chesson 2000), our model results demonstrated  
397 that interference interactions during the reproductive stage hamper the coexistence of two  
398 species even when they demonstrate equal competitive strength for resources. In addition, our  
399 model results showed that slight differences in mating activity, mating preference, and  
400 remating acceptance determine which of two interacting species is superior with respect to  
401 reproductive interference (Figs. SI 2 and SI 3), whereas previous theoretical studies on  
402 reproductive interference did not fully take into account the consequences of behavioural  
403 processes on population dynamics and species' fates (Yoshimura and Clark 1994, Kishi and  
404 Nakazawa 2013, Kyogoku and Sota 2017). In addition, we found that species exclusion is  
405 more likely to occur for a wide range of initial population densities of the two species when  
406 the intensity of reproductive interference is high (Fig. 2). This finding means that closely  
407 related species are unlikely to coexist in the same environment if they have similar mating

408 signals or if they share a reproductive niche in space and time; as a result, niche partitioning  
409 or geographical segregation of the species is likely to occur.

410 Our comparative study found a separation of niche use or geographical distributions  
411 between species pairs with CSP in a range of taxa (Table 3). This finding suggests that CSP  
412 alone does not allow these species pairs to coexist in the same local environment. The pattern  
413 corresponds found in our comparative study is consistent with the prediction of our  
414 mathematical model that two interacting species are unlikely to coexist when  $c$  (intensity of  
415 reproductive interference) is high (Fig. 2). However, sympatric coexistence without apparent  
416 niche separation was also detected, especially in free-spawning marine invertebrates such as  
417 mussels, starfishes, and sea urchins (Table 3). There are several possible reasons that can  
418 account for the discrepancy between our model prediction and the actual pattern in nature in  
419 these cases. First, niche separation might actually exist, but, perhaps because of limited field  
420 survey data, it may not have been recognized. In fact, fine-scale differences in adult habitat  
421 and the timing of spawning have been detected in closely related marine invertebrate species  
422 (Lindberg 1992, Fogarty 2012). Therefore, it is possible that niche separation has actually  
423 occurred to mitigate the cost of reproductive interference in such species. Second, dispersal to  
424 new patches can allow overlapping niche use at a local scale even when two species engage in  
425 competitive interactions. Especially in marine sessile invertebrates that have high dispersal  
426 ability in the larval stage and a sedentary life style in the adult stage, source–sink dynamics

427 (Mouquet and Loreau 2003) and stochastic processes (Paine and Levin 1981) likely promote  
428 local species coexistence. Third, in sessile animals, decision making at the pre-mating stage  
429 may not be important; females may be likely to accept sperm from conspecific as well as from  
430 heterospecific males, which means that CSP makes it possible for them to produce viable  
431 offspring. In this situation, therefore, CSP can indeed mitigate the cost of interspecific mating  
432 and thus promote species coexistence in the same niche. Clearly, it is important to incorporate  
433 life-history characteristics when considering the community-level consequences of  
434 behavioural decision making in animals.

435 By including plants, it would be possible to extend our model to more general scenarios  
436 of interacting species under imperfect species recognition. Reproductive interference occurs  
437 in flowering plants when the stigma receive heterospecific as well as conspecific pollen  
438 grains, for example when flowering phenology and pollinators overlap (Matsumoto et al.  
439 2010, Runquist and Stanton 2013, Takakura 2013, Nishida et al. 2014). In some cases,  
440 however, conspecific pollen tubes preferentially grow and fertilize the ovules (Baldwin and  
441 Husband 2010, reviewed in Howard 1999). This phenomenon is called conspecific pollen  
442 precedence, and is considered a mechanism of reproductive isolation that prevents  
443 hybridization, and consequently, speciation in plants (Howard 1999). Therefore, it is  
444 suggested that conspecific pollen precedence in plants, similar to CSP in animals, can mitigate  
445 the cost of reproductive interference and lead to species coexistence in the same habitat.

446 Alternatively, as our model predicted, conspecific pollen precedence may be insufficient to  
447 allow interacting species to coexist in the same local environment. In fact, in three species of  
448 *Iris*, conspecific pollen precedence has been detected together with habitat differences  
449 (Carney et al. 1996; Emms et al. 1996), suggesting that reproductive interference destabilizes  
450 local coexistence of these species. In future, it would be interesting to examine whether our  
451 model is applicable to plant species by investigating reproductive success in species pairs  
452 exhibiting conspecific pollen precedence.

453 In conclusion, our study clarified the ecological significance of CSP by identifying  
454 conditions that lead to local species exclusion despite the presence of CSP. This finding is in  
455 contrast to those of previous studies of CSP, which have focused on its evolutionary  
456 significance, that is, speciation through post-mating pre-zygotic reproductive isolation.  
457 Moreover, many CSP studies have not quantified pre-mating behaviours that can affect the  
458 reproductive success of females but have instead examined the functioning of CSP by  
459 focusing on post-mating, pre-zygotic mechanisms. Importantly, however, it has been  
460 documented that the overall costs of reproductive interference, including loss of mating  
461 opportunity and decreases in the oviposition rate due to male interference, can lead to the  
462 extinction of one of the interacting species even if interspecific mating and insemination does  
463 not occur (Kishi et al. 2009, Friberg et al. 2013, Carrasquilla and Lounibos 2015). Therefore,  
464 to understand individual reproductive success and community structure of closely related



465 species, pre-mating behaviours should not be neglected.

466

## 467 **Acknowledgements**

468

469 S.N. would like to thank staff members at the University of Tokyo Tanashi Forest for

470 permission to collect insects. This study was supported grants from the Natural Environment

471 Research Council (NERC) to R.I. (NE/K014617/1) and the Japan Society for the Promotion

472 of Science to S.N (No. 26840137).

473

## 474 **Declarations**

475 The authors declare no competing interest.

476 **References**

477

478 Ackleh, A. S. & P. L. Salceanu (2014). “Competitive Exclusion Through Discrete  
479 Time Models”. *Theory and Applications of Difference Equations and Discrete  
480 Dynamical Systems*. Springer, pp. 3–21.

481

482 Alcock, J. 1994. Postinsemination associations between males and females in insects: the  
483 mate-guarding hypothesis. – *Annu. Rev. Entomol.* 39:1–21.

484

485 Arnqvist, G. and Rowe, L. 2005. *Sexual conflict*. – Princeton Univ. Press.

486

487 Baldwin, S. J. and Husband, B. C. 2010. Genome duplication and the evolution of conspecific  
488 pollen precedence. – *Proc. Roy. Soc. Lond. B Biol. Sci.* 278:1714.

489

490 Bargielowski, I. E. et al. 2013. Evolution of resistance to satyriation through reproductive  
491 character displacement in populations of invasive dengue vectors. *Proc. Natl. Acad. Sci.* –  
492 110:2888–2892.

493

494 Bates, D. et al. 2015. Fitting linear mixed-effects models using lme4. – *J. Stat. Soft.* 67:1–48.

495

496 Beverton, R. J. H., & Holt, S. J. (1957). On the dynamics of exploited fish populations.  
497 Fisheries Investigation Series 2, volume 19, UK Ministry of Agriculture. *Fisheries, and Food*,  
498 *London, UK*.

499

500 Butlin, R. K. 1998. What do hybrid zones in general, and the *Chorthippus parallelus* zone in  
501 particular, tell us about speciation. – In: Endless forms: species and speciation. Oxford Univ.  
502 Press, pp. 367–378.

503

504 Butlin, R. K. and Hewitt, G. M. 1985. A hybrid zone between *Chorthippus parallelus*  
505 *parallelus* and *Chorthippus parallelus erythropus* (Orthoptera: Acrididae): morphological and  
506 electrophoretic characters. – Biol. J. Linn. Soc. 26:269–285.

507

508 Carney, S. E. et al. 1996. Effects of differential pollen-tube growth on hybridization in the  
509 Louisiana irises. – Evolution 50:1871–1878.

510

511 Carrasquilla, M. C. and Lounibos, L. P. 2015. Satyrization without evidence of successful  
512 insemination from interspecific mating between invasive mosquitoes. – Biol. Lett. 11:  
513 20150527.

514

515 Carter, J. V. et al. 2016. ROC-ing along: evaluation and interpretation of receiver operating

516 characteristic curves. – *Surgery* 159:1638–1645.

517

518 Chang, A. S. 2004. Conspecific sperm precedence in sister species of *Drosophila* with

519 overlapping ranges. – *Evolution* 58:781–789.

520

521 Chesson, P. 2000. Mechanisms of maintenance of species diversity. – *Annu. Rev. Ecol.*

522 *Sys.* 31:343–366.

523

524 Christianson, S. J. et al. 2005. Rapid evolution of postzygotic reproductive isolation in stalk-

525 eyed flies. – *Evolution* 59:849–857.

526

527 Cox, K. W. 1962. California abalones, family Haliotidae. – Department of Fish and Game, the

528 Resources Agency of California.

529

530 Crowder, D. W. et al. 2011. Niche partitioning and stochastic processes shape community

531 structure following whitefly invasions. – *Bas. Appl. Ecol.* 12:685–694.

532

533 Dean, M. D. and Nachman, M. W. 2009. Faster fertilization rate in conspecific versus

534 heterospecific matings in house mice. – *Evolution*, 63:20–28.

535

536 Eberhard, W. G. 1996. Female control: sexual selection by cryptic female choice. – Princeton

537 Univ. Press.

538

539 Emms, S. K. et al. 1996. Pollen-tube competition, siring success, and consistent asymmetric

540 hybridization in Louisiana irises. – *Evolution* 50:2201–2206.

541

542 Ficetola, G. F. and Bernardi, F. D. 2005. Interspecific social interactions and breeding success

543 of the frog *Rana latastei*: a field study. – *Ethology* 111:764–774.

544

545 Friberg, M. et al. 2013. Heterospecific courtship, minority effects and niche separation

546 between cryptic butterfly species. – *J. Evol. Biol.* 26:971–979.

547

548 Fricke, C. and Arnqvist, G. 2004. Conspecific sperm precedence in flour beetles. – *Anim.*

549 *Beh.* 67:729–732.

550

551 Fogarty, N. D. et al. 2012. Asymmetric conspecific sperm precedence in relation to spawning

552 times in the *Montastraea annularis* species complex (Cnidaria: Scleractinia). – *J. Evol.*

553 *Biol.* 25:2481–2488.

554

555 Gaitán-Espitia, J. D. et al. 2016. Mitogenomics of southern hemisphere blue mussels

556 (Bivalvia: Pteriomorpha): Insights into the evolutionary characteristics of the *Mytilus edulis*

557 complex. – Sci. Rep. 6:26853.

558

559 Geyer, L. B. and Palumbi, S. R. 2005. Conspecific sperm precedence in two species of

560 tropical sea urchins. – Evolution 59:97–105.

561

562 Gillott, C. 2003. Male accessory gland secretions: modulators of female reproductive

563 physiology and behavior. – Annu. Rev. Entomol. 48:163–184.

564

565 Grant, P. R. and Grant, B. R. 2011. How and why species multiply: the radiation of Darwin's

566 finches. – Princeton Univ. Press.

567

568 Green, D.M. and Swets, J.A. 1966. Signal detection theory and psychophysics. – Wiley.

569

570 Gröning, J. and Hochkirch, A. 2008. Reproductive interference between animal species. –

571 Quart. Rev. Biol. 83:257–282.

572

- 573 Harper, F. M. and Hart, M. W. 2005. Gamete compatibility and sperm competition affect  
574 paternity and hybridization between sympatric *Asterias* sea stars. – Biol. Bull. 209:113–126.  
575
- 576 Harrison, R. G. and Arnold, J. 1982. A narrow hybrid zone between closely related cricket  
577 species. – Evolution 36:535–552.  
578
- 579 Heggberget, T. G. et al. 1988. Temporal and spatial segregation of spawning in sympatric  
580 populations of Atlantic salmon, *Salmo salar* L., and brown trout, *Salmo trutta* L. – J. Fish  
581 Biol. 33:347–356.  
582
- 583 Hewitt, G. M. 1975. A sex-chromosome hybrid zone in the grasshopper *Podisma pedestris*  
584 (Orthoptera: Acrididae). – Heredity 35:375–387.  
585
- 586 Hewitt, G. M. et al. 1989. Sperm precedence and homogamy across a hybrid zone in the  
587 alpine grasshopper *Podisma pedestris*. – Heredity 62:343–353.  
588
- 589 Himuro, C. and Fujisaki, K. 2008. Males of the seed bug *Togo hemipterus* (Heteroptera:  
590 Lygaeidae) use accessory gland substances to inhibit remating by females. – J. Insect  
591 Physio. 54:1538–1542.

592

593 Howard, D. J. 1999. Conspecific sperm and pollen precedence and speciation. – *Annu. Rev.*

594 *Ecol. Sys.* 30:109–132.

595

596 Howard, D. J. et al. 1998. Conspecific sperm precedence is an effective barrier to

597 hybridization between closely related species. – *Evolution* 52:511–516.

598

599 Howard, D. J. and Waring, G. L. 1991. Topographic diversity, zone width, and the strength of

600 reproductive isolation in a zone of overlap and hybridization. – *Evolution* 45:1120–1135.

601

602 Hochkirch, A. et al. 2007. Sympatry with the devil: reproductive interference could hamper

603 species coexistence. – *J. Anim. Ecol.* 76:633–642.

604

605 Immler, S. et al. 2011. Post-mating reproductive barriers in two unidirectionally hybridizing

606 sunfish (Centrarchidae: *Lepomis*). – *J. Evol. Biol.* 24:111–120.

607

608 Jonsson, B. and Jonsson, N. 2009. A review of the likely effects of climate change on

609 anadromous Atlantic salmon *Salmo salar* and brown trout *Salmo trutta*, with particular

610 reference to water temperature and flow. – *J. Fish Biol.* 75:2381–2447.



- 611
- 612 Kawatsu, K. and Kishi, S. 2017. Identifying critical interactions in complex competition  
613 dynamics between bean beetles. – *Oikos*. doi:10.1111/oik.04103
- 614
- 615 Klibansky, L. K. and McCartney, M. A. 2014. Conspecific sperm precedence is a reproductive  
616 barrier between free-spawning marine mussels in the northwest Atlantic *Mytilus* hybrid  
617 zone. – *Plos One* 9:e108433.
- 618
- 619 Kishi, S. and Nakazawa, T. 2013. Analysis of species coexistence co-mediated by resource  
620 competition and reproductive interference. – *Popul. Ecol.* 55:305–313.
- 621
- 622 Kishi, S. et al. 2009. Reproductive interference determines persistence and exclusion in  
623 species interactions. – *J. Anim. Ecol.* 78:1043–1049.
- 624
- 625 Konuma, J. and Chiba, S. 2007. Ecological character displacement caused by reproductive  
626 interference. – *J. Theor. Biol.* 247:354–364.
- 627
- 628 Kresge, N. et al. 2000. The high resolution crystal structure of green abalone sperm lysin:  
629 implications for species-specific binding of the egg receptor1. – *J. Mol. Biol.* 296:1225–1234.

630

631 Kyogoku, D. 2015. Reproductive interference: ecological and evolutionary consequences of

632 interspecific promiscuity. – *Popul. Ecol.* 57:253–260.

633

634 Kyogoku, D. and Sota, T. 2015. Exaggerated male genitalia intensify interspecific

635 reproductive interference by damaging heterospecific female genitalia. – *J. Evol. Biol.* 28:

636 1283–1289.

637

638 Kyogoku, D. and Sota, T. 2017. A generalized population dynamics model for reproductive

639 interference with absolute density dependence. – *Sci. Rep.* 7:1996.

640

641 Kuno, E. 1992. Competitive exclusion through reproductive interference. – *Res. Popul. Ecol.*

642 34:275–284.

643

644 Lachaise, D. et al. 2000. Evolutionary novelties in islands: *Drosophila santomea*, a new

645 *melanogaster* sister species from Sao Tome. – *Proc. Roy. Soc. Lond. B Biol. Sci.* 267:1487–

646 1495.

647

648 Larson, E. L. et al. 2012. Post-mating prezygotic barriers to gene exchange between

649 hybridizing field crickets. – J. Evol. Biol. 25:174–186.

650

651 Lindberg, D. R. 1992. Evolution, distribution and systematics of Haliotidae. – In:

652 Shepherd, S. A. et al. (eds) Abalone of the world: biology, fisheries and culture. Wiley-

653 Blackwell.

654

655 Losos, J. B. 2011. Lizards in an evolutionary tree: ecology and adaptive radiation of anoles. –

656 Univ. California Press.

657

658 Majerus, M. E. N. 2003. Sex wars: genes, bacteria and biased sex ratios. – Princeton Univ.

659 Press.

660

661 Makowski, D. 2017. Package 'neuropsychology': an R toolbox for psychologists,

662 neuropsychologists and neuroscientists. Available from

663 <https://github.com/neuropsychology/neuropsychology.R>

664

665 Marshall, J. L. et al. 2002. Reinforcement: the road not taken. – Trend. Ecol. Evol. 17:558–

666 563.

667

- 668 Matsubayashi, K. W. and Katakura, H. 2009. Contribution of multiple isolating barriers to  
669 reproductive isolation between a pair of phytophagous ladybird beetles. – *Evolution* 63:2563–  
670 2580.
- 671
- 672 Matsumoto, K. and Suzuki, N. 1992. Effectiveness of the mating plug in *Atrophaneura*  
673 *alcinous* (Lepidoptera: Papilionidae). – *Behav. Ecol. Sociobiol.* 30:157–163.
- 674
- 675 Matsumoto, T. et al. 2010. Alien pollen grains interfere with the reproductive success of  
676 native congener. – *Biol. Inv.* 12:1617–1626.
- 677
- 678 May, R. M., & Oster, G. F. (1976). Bifurcations and dynamic complexity in simple ecological  
679 models. *The American Naturalist*, 110(974), 573-599.
- 680
- 681 Mendelson, T. C. et al. 2007. The accumulation of reproductive barriers during speciation:  
682 postmating barriers in two behaviorally isolated species of darters (Percidae: *Etheostoma*). –  
683 *Evolution* 61:2596–2606.
- 684
- 685 Menge, B. A. 1979. Coexistence between the seastars *Asterias vulgaris* and *A. forbesi* in a  
686 heterogeneous environment: a non-equilibrium explanation. – *Oecologia* 41:245–272.
- 687

- 688 Metz, E. C. et al. 1994. Fertilization between closely related sea urchins is blocked by  
689 incompatibilities during sperm-egg attachment and early stages of fusion. –Biol. Bull. 187:  
690 23–34.
- 691
- 692 Mouquet, N. and Loreau, M. 2003. Community patterns in source–sink metacommunities. –  
693 Am. Nat. 162:544–557.
- 694
- 695 Nakano, S. 1985. Effect of interspecific mating on female fitness in two closely related  
696 ladybirds (*Henosepilachna*). – Kontyû 53:112–119.
- 697
- 698 Nijjima, K. et al. 2000. Development of low-cost and laborsaving technique for group rearing  
699 of a ladybird, *Harmonia axyridis*. – Tamagawa Univ. Res. Rev. 6:23–33 [in Japanese with  
700 English abstract].
- 701
- 702 Nishida, S. et al. 2014. Pollen–pistil interactions in reproductive interference: comparisons of  
703 heterospecific pollen tube growth from alien species between two native *Taraxacum*  
704 species. – Func. Ecol. 28:450–457.
- 705
- 706 Nishida, T. et al. 2015. Host specialization by reproductive interference between closely

- 707 related herbivorous insects. – Popul. Ecol. 57:273–281.
- 708
- 709 Noriyuki, S. and Osawa, N. 2012. Intrinsic prey suitability in specialist and generalist
- 710 *Harmonia* ladybirds: a test of the trade-off hypothesis for food specialization. – Entomol.
- 711 Exp. Appl. 144:279–285.
- 712
- 713 Noriyuki, S. et al. 2011. Prey capture performance in hatchlings of two sibling *Harmonia*
- 714 ladybird species in relation to maternal investment through sibling cannibalism. – Ecol.
- 715 Entomol. 36:282–289.
- 716
- 717 Noriyuki, S. et al. 2012. Asymmetric reproductive interference between specialist and
- 718 generalist predatory ladybirds. – J. Anim. Ecol. 81:1077–1085.
- 719
- 720 Noriyuki, S. et al. 2014. Prevalence of male-killer in a sympatric population of two sibling
- 721 ladybird species, *Harmonia yedoensis* and *Harmonia axyridis* (Coleoptera: Coccinellidae). –
- 722 Eur. J. Entomol. 111:307–311.
- 723
- 724 Noriyuki, S. et al. 2016. Variation of clutch size and trophic egg proportion in a ladybird with
- 725 and without male-killing bacterial infection. – Evol. Ecol. 30:1081–1095.

726

727 Okada, I. et al. 1978. Comparative studies on sibling species of ladybeetles, *Harmonia*

728 *yedoensis* and *H. axyridis* (Coleoptera: Coccinellidae). – Bull. Fac. Agr. Tamagawa Univ.

729 18:60–68 [in Japanese with English abstract].

730

731 Osenberg, C. W. et al. 1992. Two-stage life histories in fish: the interaction between juvenile

732 competition and adult performance. – Ecology 73:255–267.

733

734 Otte, T. et al. 2016. Phenotypic plasticity of mate recognition systems prevents sexual

735 interference between two sympatric leaf beetle species. – Evolution 70:1819–1828.

736

737 Paine, R. T. and Levin, S. A. 1981. Intertidal landscapes: disturbance and the dynamics of

738 pattern. – Ecol. Monog. 51:145–178.

739

740 Payseur, B. A. et al. 2004. Differential patterns of introgression across the X chromosome in a

741 hybrid zone between two species of house mice. – Evolution 58:2064–2078.

742

743 Polak, M. et al. 2001. Function of the mating plug in *Drosophila hibisci* Bock. – Behav. Ecol.

744 Sociobiol. 49:196–205.

745

746 Price, C. S. 1997. Conspecific sperm precedence in *Drosophila*. – Nature 388:663–666.

747

748 Qvarnström, A. et al. 2009. Life-history divergence facilitates regional coexistence of  
749 competing *Ficedula* flycatchers. – Ecology 90:1948–1957.

750

751 R Core Team 2017. R: A language and environment for statistical computing. – R Foundation  
752 for Statistical Computing, Vienna, Austria. URL <https://www.R-project.org/>.

753

754 Ramiro, R.S. et al. 2015. Hybridization and pre-zygotic reproductive barriers in *Plasmodium*.  
755 – Proc. Roy. Soc. Lond. B Biol. Sci. 282:20143027.

756

757 Robin, X. et al. 2011. pROC: an open-source package for R and S+ to analyze and compare  
758 ROC curves. – BMC Bioinfo. 12:77.

759

760 Rose, E. G. et al. 2014. Rapid evolution of asymmetric reproductive incompatibilities in stalk-  
761 eyed flies. – Evolution 68:384–396.

762

763 Rugman-Jones, P. F. and Eady, P. E. 2007. Conspecific sperm precedence in *Callosobruchus*



764 *subinnotatus* (Coleoptera: Bruchidae): mechanisms and consequences. – Proc.Roy. Soc. Lond,

765 B Biol. Sci. 274:983–988.

766

767 Runquist, R. B. and Stanton, M. L. 2013. Asymmetric and frequency-dependent pollinator-

768 mediated interactions may influence competitive displacement in two vernal pool plants. –

769 Ecol. Lett. 16:183–190.

770

771 Ruokolainen, L. and Hanski, I. 2016. Stable coexistence of ecologically identical species:

772 conspecific aggregation via reproductive interference. – J. Anim. Ecol. 85–638–647.

773

774 Sánchez-Guillén, R. A. et al. 2005. Hybridization and the inheritance of female colour

775 polymorphism in two ischnurid damselflies (Odonata: Coenagrionidae). – Biol. J. Linn.

776 Soc. 85:471–481.

777

778 Sánchez-Guillén, R. A. et al. 2011a. Introgression and rapid species turnover in sympatric

779 damselflies. – BMC Evol. Biol. 11:210.

780

781 Sánchez-Guillén, R. A. et al. 2011b. Strong asymmetry in the relative strengths of prezygotic

782 and postzygotic barriers between two damselfly sister species. – Evolution 66:690–707.

783

784 Sánchez-Guillén, R. A. et al. 2013. An examination of competitive gametic isolation

785 mechanisms between the damselflies *Ischnura graellsii* and *I. elegans*. – Internatio. J.

786 Odonat. 16:259–267.

787

788 Sing, T. et al. 2005. ROCR: visualizing classifier performance in R. – Bioinformatics 21:

789 3940–3941.

790

791 Schluter, D. 2000. The ecology of adaptive radiation. – Oxford Univ. Press.

792

793 Scott, D. 1986. Inhibition of female *Drosophila melanogaster* remating by a seminal fluid

794 protein (esterase 6). – Evolution 40:1084–1091.

795

796 Takafuji, A. et al. 1997. Reproductive interference and its consequences for the competitive

797 interactions between two closely related *Panonychus* spider mites. – Exp. Appl. Acaro. 21:

798 379–391.

799

800 Takakura, K. I. 2013. Two-way but asymmetrical reproductive interference between an

801 invasive *Veronica* species and a native congener. – Am. J. Plant Sci. 4:535–542.

802

803 Thum, R. 2007. Reproductive interference, priority effects and the maintenance of parapatry

804 in *Skistodiaptomus* copepods. – *Oikos* 116:759–768.

805

806 Todesco, M. et al. 2016. Hybridization and extinction. – *Evol. Appl.* 9:892–908.

807

808 Tyler, F. et al. 2013. Multiple post-mating barriers to hybridization in field crickets. – *Mol.*

809 *Ecol.* 22:1640–1649.

810

811 Vacquier, V. D. et al. 1990. Species-specific sequences of abalone lysin, the sperm protein that

812 creates a hole in the egg envelope. – *Proc. Natl. Acad. Sci.* 87:5792–5796.

813

814 Vacquier, V. D. and Lee, Y. H. 1993. Abalone sperm lysin: unusual mode of evolution of a

815 gamete recognition protein. – *Zygote* 1:181–196.

816

817 Vallin, N. et al. 2012. Combined effects of interspecific competition and hybridization impede

818 local coexistence of *Ficedula* flycatchers. – *Evol. Ecol.* 26:927–942.

819

820 Veen, T. et al. 2001. Hybridization and adaptive mate choice in flycatchers. – *Nature* 411:45–

821 50.

822

823 Veen, T. et al. 2013. Diverse reproductive barriers in hybridising crickets suggests extensive  
824 variation in the evolution and maintenance of isolation. – *Evol. Ecol.* 27:993–1015.

825

826 Williams, T. H. and Mendelson, T. C. 2014. Quantifying reproductive barriers in a sympatric  
827 pair of darter species. – *Evol. Biol.* 41:212–220.

828

829 Wolfram Research, I. (2017). *Mathematica 11.2*.

830

831 Yeates, S. E. et al. 2013. Cryptic choice of conspecific sperm controlled by the impact of  
832 ovarian fluid on sperm swimming behavior. – *Evolution* 67:3523–3536.

833

834 Yoshimura, J. and Clark, C.W. 1994. Population dynamics of sexual and resource  
835 competition. – *Theor. Popul. Biol.* 45:121–131.

836

837 **Figures**

838

Unmated → 1st mating → 2nd mating → Reproduction

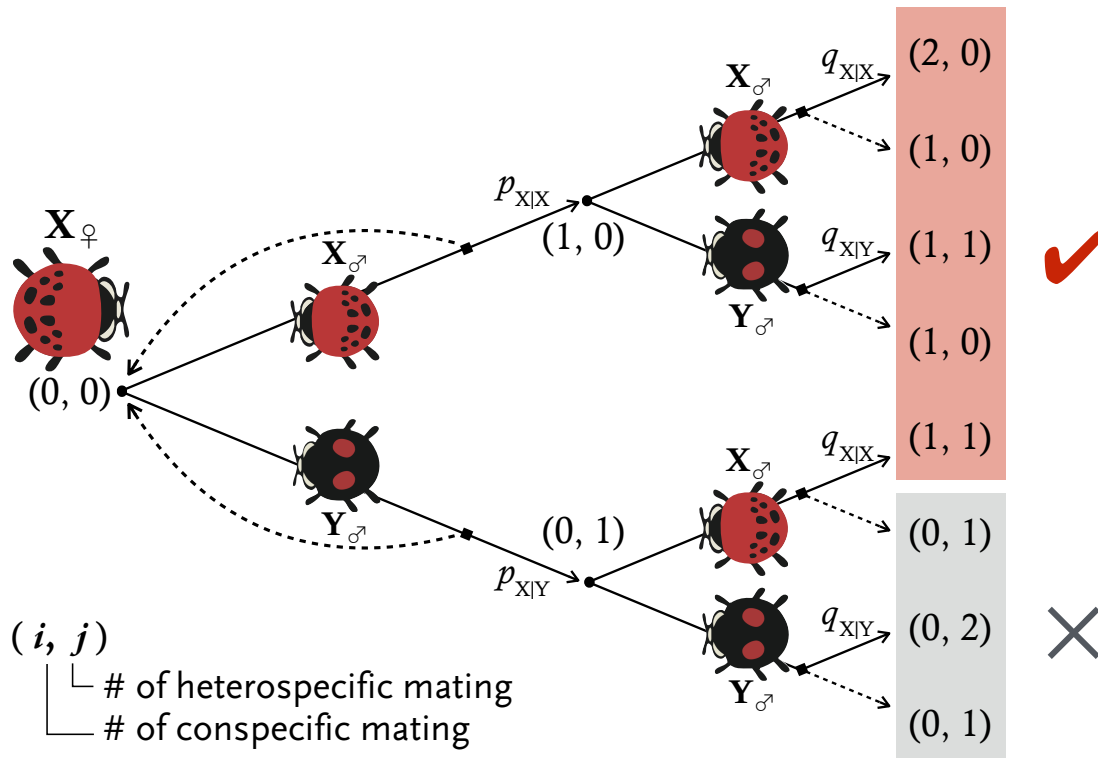

839

840

841 **Fig. 1.** Schematic mating decision-making tree for a female of species X according to our

842 mathematical model. Here, (i, j) means a female with i intraspecific matings and j

843 interspecific matings ( $1 \leq i + j \leq 2$ ). A virgin female has state (0, 0), and she accepts a

844 given X-male or Y-male with a probability  $p_{X|X}$  and  $p_{X|Y}$ , respectively. Subsequently, the non-

845 virgin female with state (0, 1) or (1, 0) accepts an X-male or Y-male with probability  $q_{X|X}$  or

846  $q_{X|Y}$ , respectively. The corresponding mating decision-making tree for a Y-female can be

847 obtained by exchanging X and Y. The female states after the second mating that include at

848 least one intraspecific mating ( $i \geq 1$ ) are shaded red; in this case, the female can produce  
849 offspring of her own species through CSP. The states of females that failed to copulate with a  
850 conspecific male before producing offspring ( $i = 0$ ) are shaded grey.  
851

852 **a**

Intensity of RI: 0.5

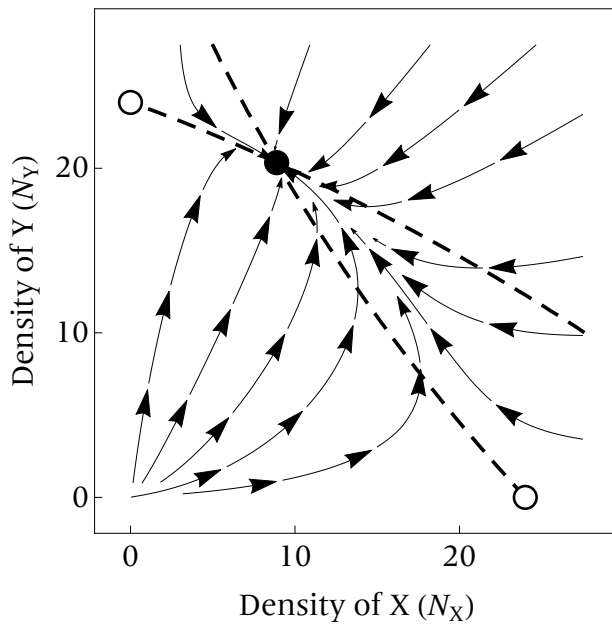

853

854 **b**

Intensity of RI: 1.

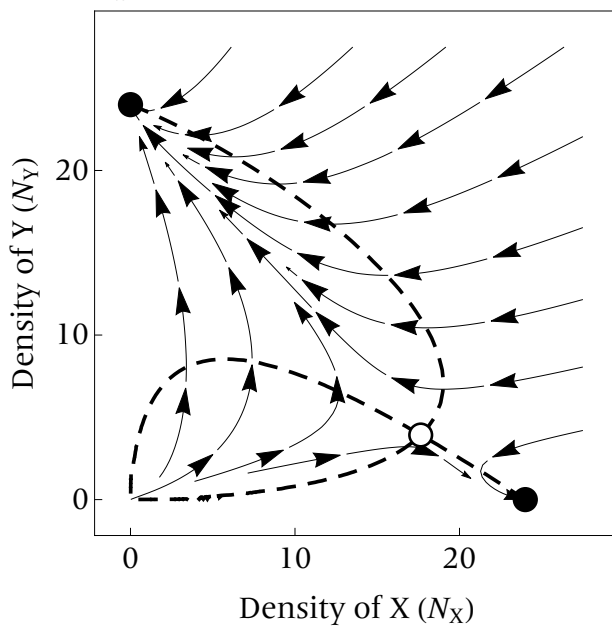

855

856 **Fig. 2.** Phase portraits of the population dynamics according to the original, time-discrete

857 dynamics and the approximated, time-continuous dynamics (i.e. ODE), for varying intensities

858 of reproductive interference (RI; tuned by  $c$ ). (a) Co-existence is possible when RI intensity is

859 weak ( $c = 0.5$ ). (b) Competitive exclusion occurs when RI intensity is very strong ( $c = 1$ ).

860 Dotted curves, isoclines; arrows: approximated vector fields based on the ODE; open circles,

861 unstable equilibria; and closed circles, stable equilibria. The procedure used to produce the

862 figures is described in Appendix C. Probability parameter values:  $p_{XX} = 0.4$ ,  $q_{XX} =$

863  $0.4$ ,  $p_{XY} = 0.8$ ,  $p_{YY} = 0.8$ ,  $p_{YX} = 0.4$ ,  $q_{YY} = 0.8$ ; other parameters, default values (see

864 Table 1).



865

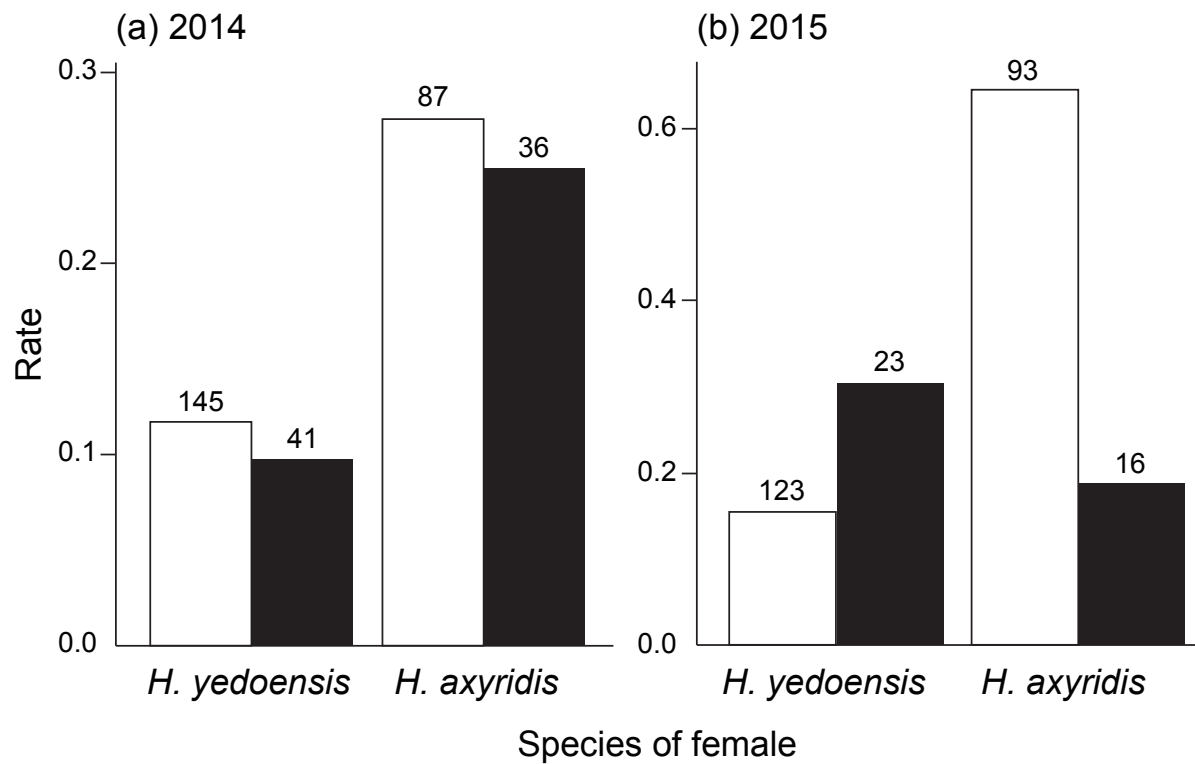

866

867

868 **Fig. 3.** Mating rates with conspecific (white) and heterospecific (black) males in the (a) 2014

869 and (b) 2015 experiments. The number of individuals in each category is shown above each

870 bar.

871

872

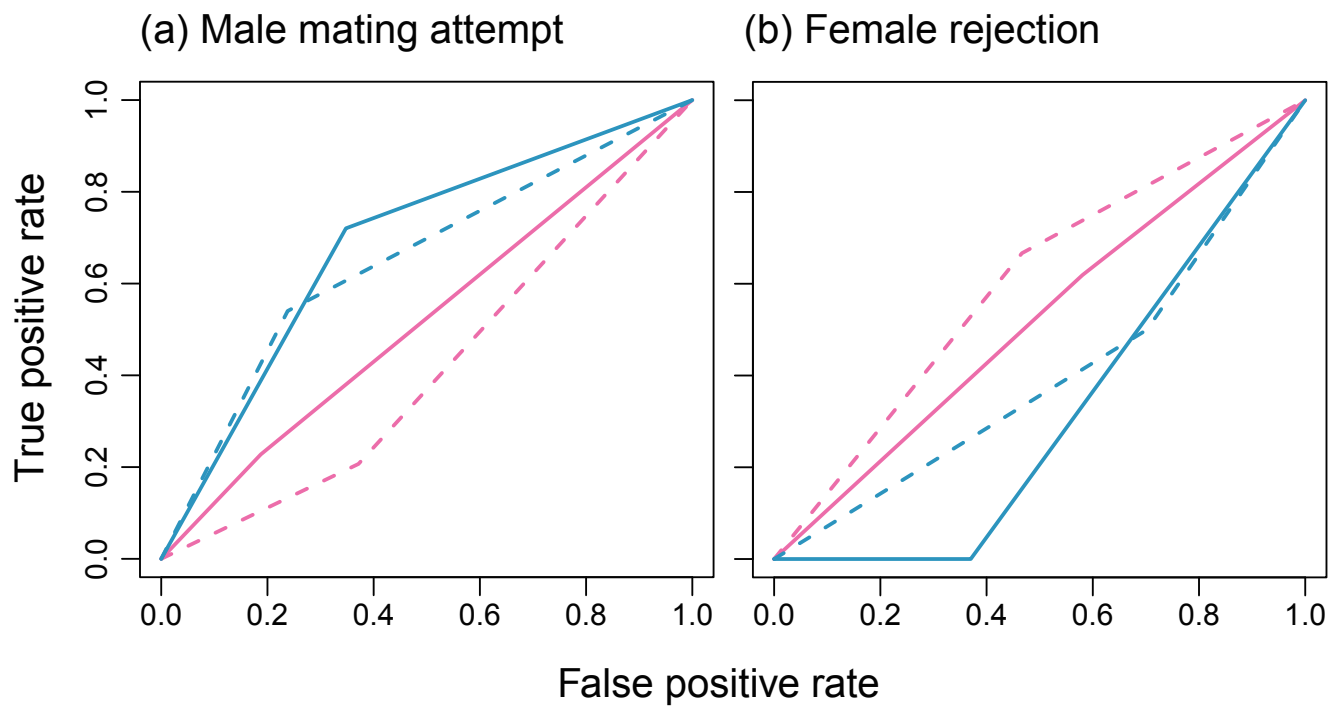

873

874

875 **Fig. 4.** Receiver operating characteristic curves for (a) mating attempts by males and (b)

876 rejection behaviour in females. In each panel, red and blue lines indicate *H. yedoensis* and *H.*

877 *axyridis*, respectively, and dashed and solid lines indicate the 2014 and 2015 experiments,

878 respectively.

879

880

881 **Table 1.** Parameters included in the model.

882

| Parameter/Variable          | Definition                                                                                                                                     | Default value (if any) |
|-----------------------------|------------------------------------------------------------------------------------------------------------------------------------------------|------------------------|
| X or Y                      | Species label                                                                                                                                  | –                      |
| $N_X, N_Y$                  | Density of X or Y                                                                                                                              | Dynamic variable       |
| $t$                         | Generation ( $t \geq 0$ )                                                                                                                      | –                      |
| $r$                         | Egg production (per capita)                                                                                                                    | 25                     |
| $v$                         | Density dependence of resource competition ( $v > 0$ )                                                                                         | 1                      |
| $b$                         | Strength of interspecific competition ( $b > 0$ )                                                                                              | 0.3                    |
| $c$                         | Strength of reproductive interference ( $0 < c < 1$ ); probability that a female is subject to a possible heterospecific mating                | Varied                 |
| $p_{i j}$                   | Probability that a virgin female of species $i$ accepts a mating attempt by a male of species $j$ , where $i$ and $j$ can be either X or Y     | See Fig. 2             |
| $q_{i j}$                   | Probability that a non-virgin female of species $i$ accepts a mating attempt by a male of species $j$ , where $i$ and $j$ can be either X or Y | See Fig. 2             |
| $f_X (= N_X / (N_X + N_Y))$ | Frequency of species X in the population                                                                                                       | Dynamic variable       |
| $E_X, E_Y$                  | Expected reproductive output (per capita), calculated based upon the mating decision-making tree (see Fig. 1), for species X or Y              | –                      |

883

884

885 **Table 2.** Comparison of the area under curve (AUC) values between species. Statistically

886 significant results are shown in boldface.

887

| Behaviour           | Year | AUC                 |                    | Statistic |         |                |
|---------------------|------|---------------------|--------------------|-----------|---------|----------------|
|                     |      | <i>H. yedoensis</i> | <i>H. axyridis</i> | <i>D</i>  | df      | <i>P</i>       |
| Male mating attempt | 2014 | 0.429               | 0.635              | -3.738    | 298.130 | < <b>0.001</b> |
|                     | 2015 | 0.512               | 0.630              | -2.247    | 220.750 | <b>0.026</b>   |
| Female rejection    | 2014 | 0.571               | 0.421              | 1.648     | 87.723  | 0.103          |
|                     | 2015 | 0.519               | 0.485              | 0.481     | 52.513  | 0.632          |

888

1 **Table 3.** Summary of comparative study results.

2

| Group                                               | Common name              | Species pair                                                 | Category                                           | Description                                             | Reference |        |
|-----------------------------------------------------|--------------------------|--------------------------------------------------------------|----------------------------------------------------|---------------------------------------------------------|-----------|--------|
| Marine invertebrate                                 | Abalone                  | <i>Haliotis corrugata</i> and <i>H. rufescens</i>            | Sympatry                                           | Niche overlap in terms of water depth and habitat       | 1–3       |        |
|                                                     |                          | <i>Haliotis cracherodii</i> and <i>H. rufescens</i>          | Niche partitioning                                 | Intertidal zone versus kelp forest habitat              | 3, 4      |        |
|                                                     |                          | <i>Haliotis fulgens</i> and <i>H. rufescens</i>              | Niche partitioning                                 | Shallow versus deep water habitats                      | 2, 3, 5   |        |
|                                                     | Blue mussel              | <i>Mytilus trossulus</i> and <i>M. edulis</i>                | Sympatry                                           | Hybrid zone is not narrow                               | 6, 7      |        |
|                                                     | Starfish                 | <i>Asterias forbesi</i> and <i>A. rubens</i>                 | Sympatry                                           | Similar habitats, food resources, and spawning time     | 8, 9      |        |
|                                                     | Coral                    | <i>Montastraea annularis</i> and <i>M. franksi</i>           | Niche partitioning                                 | Separation in (slightly overlapped) spawning time       | 10        |        |
|                                                     | Sea urchin               | <i>Echinometra mathaei</i> and <i>E. oblonga</i>             | Sympatry                                           | Slight ecological differences                           | 11        |        |
|                                                     |                          | <i>Echinometra oblonga</i> and <i>E. sp. C</i>               | Sympatry                                           | Slight difference in habitat but similar spawning time  | 12        |        |
|                                                     | Terrestrial invertebrate | Cricket                                                      | <i>Allonemobius fasciatus</i> and <i>A. socius</i> | Parapatry                                               |           | 13, 14 |
|                                                     |                          |                                                              | <i>Gryllus firmus</i> and <i>G. pennsylvanicus</i> | Parapatry                                               |           | 15, 16 |
| <i>Gryllus bimaculatus</i> and <i>G. campestris</i> |                          |                                                              | Parapatry                                          |                                                         | 17, 18    |        |
| Grasshopper                                         |                          | <i>Chorthippus p. parallelus</i> and <i>C. p. erythropus</i> | Parapatry                                          |                                                         | 19, 20    |        |
|                                                     |                          | <i>Podisma pedestris</i> races                               | Parapatry                                          |                                                         | 21, 22    |        |
| Ladybird                                            |                          | <i>Epilachna pustulosa</i> and <i>E. vigintioctomaculata</i> | Niche partitioning                                 | Host plant separation                                   | 23, 24    |        |
|                                                     |                          | <i>Harmonia yedoensis</i> and <i>H. axyridis</i>             | Niche partitioning                                 | Difference in prey item and habitat                     | 25        |        |
| Fruit fly                                           |                          | <i>Drosophila yakuba</i> and <i>D. santomea</i>              | Parapatry                                          | Lowland versus highland distributions                   | 26, 27    |        |
| Stalk-eyed fly                                      |                          | <i>Teleopsis dalmanni</i> diverged populations               | Allopatry                                          |                                                         | 28, 29    |        |
| Damselfly                                           |                          | <i>Ischnura graellsii</i> and <i>I. elegans</i>              | Niche partitioning                                 | The two species are rarely found in the same localities | 30–33     |        |
| Vertebrate                                          | Darter fish              | <i>Etheostoma barrenense</i> and <i>E. zonale</i>            | Sympatry                                           | Not closely related within the genus                    | 34        |        |
|                                                     |                          | <i>Etheostoma hopkinsi</i> and <i>E. luteovinctum</i>        | Allopatry                                          |                                                         | 35        |        |

|          |                                                    |                    |                                                         |        |
|----------|----------------------------------------------------|--------------------|---------------------------------------------------------|--------|
| Salmonid | <i>Salmo salar</i> and <i>S. trutta</i>            | Niche partitioning | Spatial and temporal segregation in spawning activities | 36–38  |
| Sunfish  | <i>Lepomis macrochirus</i> and <i>L. gibbosus</i>  | Niche partitioning | Differences in nesting and breeding habits              | 39, 40 |
| Bird     | <i>Ficedula hypoleuca</i> and <i>F. albicollis</i> | Niche partitioning | Separation in breeding habitat                          | 41–43  |
| Mouse    | <i>Mus domesticus</i> and <i>M. musculus</i>       | Parapatry          |                                                         | 44, 45 |

3

4 1: Vacquier et al. (1990); 2: Cox (1962); 3: Lindberg (1992); 4: Vacquier and Lee (1993); 5: Kresge et al. (2000); 6: Klibansky and McCartney  
5 (2014); 7: Gaitán-Espitia et al. (2016); 8: Harper and Hart (2005); 9: Menge (1979); 10: Fogarty et al. (2012); 11: Metz et al. (1994); 12: Geyer  
6 and Palumbi (2005); 13: Howard et al. (1998); 14: Howard and Waring (1991); 15: Larson et al. (2012); 16: Harrison and Arnold (1982); 17:  
7 Tyler et al. (2013); 18: Veen et al. (2013); 19: Butlin (1998); 20: Butlin and Hewitt (1985); 21: Hewitt et al. (1989); 22: Hewitt (1975); 23:  
8 Nakano (1985); 24: Matsubayashi and Katakura (2009); 25: Noriyuki et al. (2012); 26: Chang (2004); 27: Lachaise et al. (2000); 28: Rose et al.  
9 (2014); 29: Christianson et al. (2005); 30: Sanchez-Guillen et al. (2011a); 31: Sánchez-Guillén et al. (2011b); 32: Sánchez-Guillén et al. (2013a);  
10 33: Sánchez-Guillén et al. (2013b); 34: Williams and Mendelson (2014); 35: Mendelson et al. (2007); 36: Yeates et al. (2013); 37: Heggberget et  
11 al. (1988); 38: Jonsson and Jonsson (2009); 39: Immler et al. (2011); 40: Osenberg et al. (1992); 41: Veen et al. (2001); 42: Qvarnström et al.  
12 (2009); 43: Vallin et al. (2012); 44: Dean and Nachman (2009); 45: Payseur et al. (2004).
